# Supplementary material for: Inflammatory and oncogenic roles of a tumor stem cell marker doublecortin-like kinase (DCLK1) in virus-induced chronic liver diseases
Source: PubMed Central journal article supplement (PMC4653008; doi:10.18632/oncotarget.3972), 2015-04-29
Supplement: oncotarget-06-20327-s001.pdf [file oncotarget-06-20327-s001.pdf]

## Inflammatory and oncogenic roles of a tumor stem cell marker doublecortin-like kinase (DCLK1) in virus-induced chronic liver diseases

### Supplementary Material

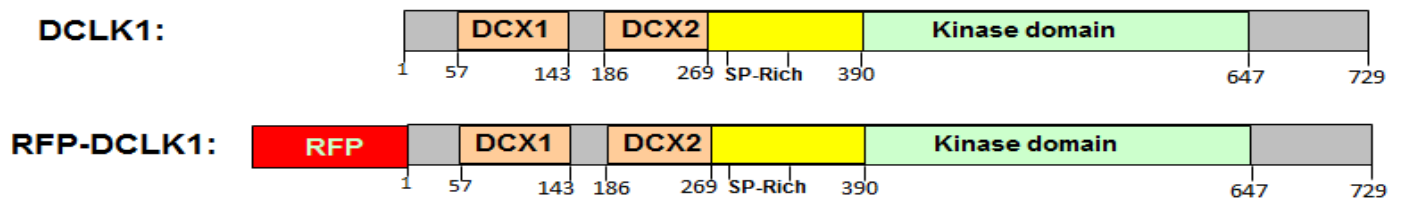

**FIG S1 Organization of DCLK1 protein domains. Recombinant DCLK1 tagged with red fluorescence protein (RFP) at the N-terminus (RFP-DCLK1) is expressed in Huh7-RD or FCA4-RD. Two doublecortin domains (DCX1 and DCX2), Ser-Pro rich domains (SP-rich) and a kinase domain are indicated.**

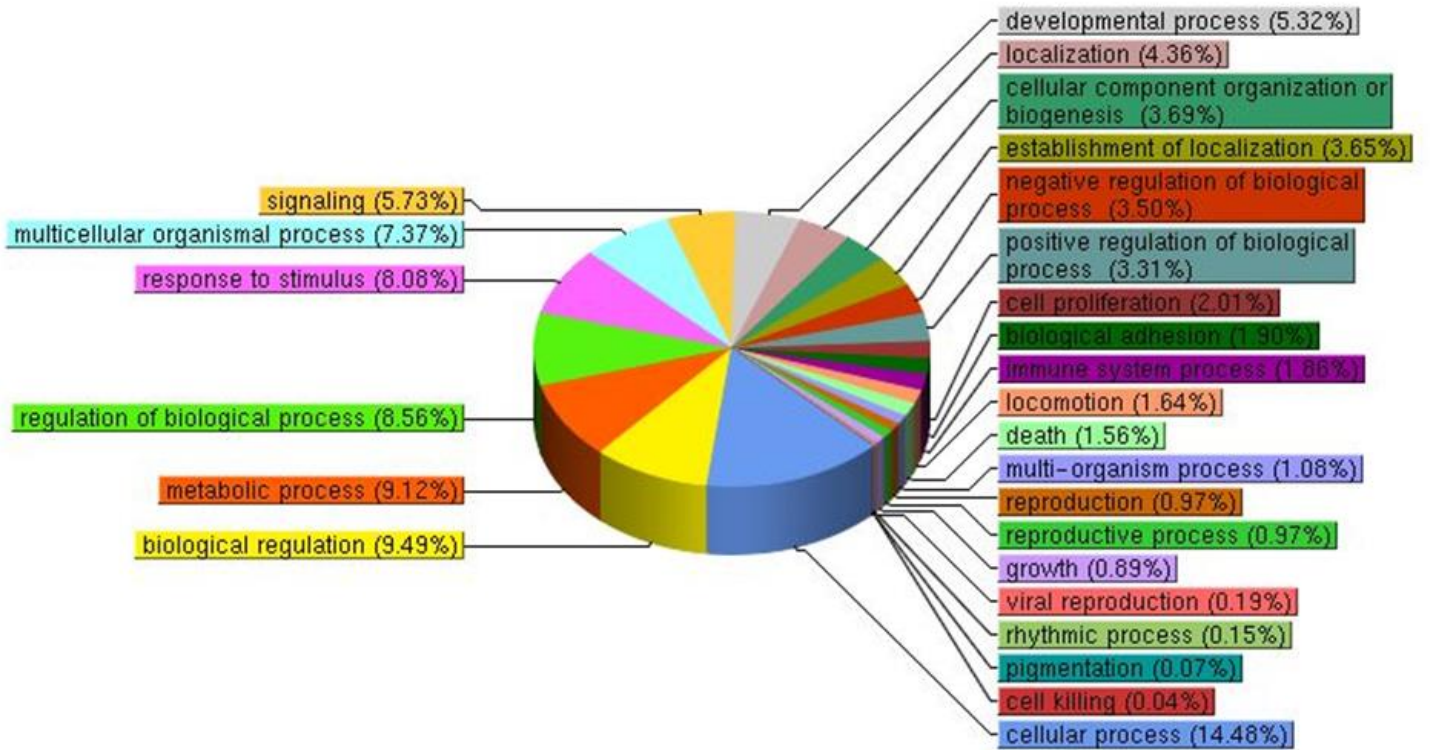

**FIG S2** Gene ontology report showing functional distribution of genes influenced by HCV and DCLK1 co-expression.

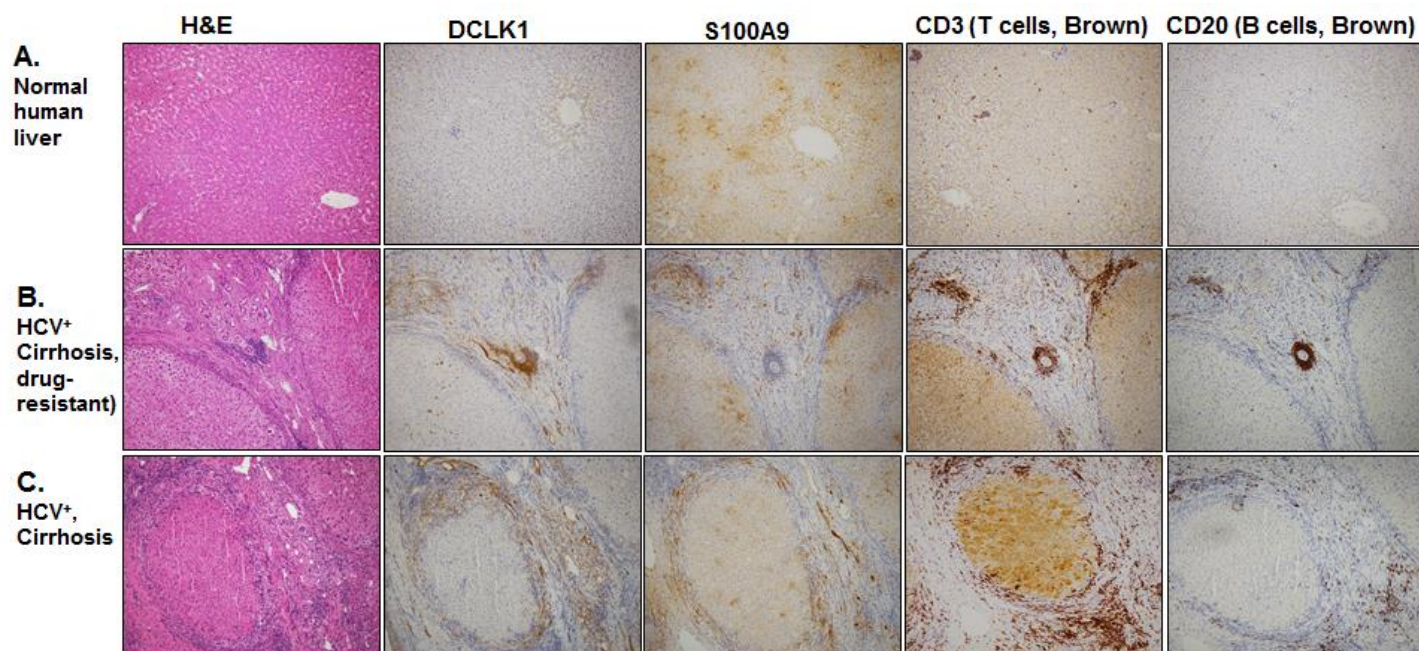

**FIG S3** Immunohistochemical staining results for liver tissues derived from HCV-positive patients at lower magnifications to show pattern of staining in larger areas of the liver. Magnification=10x. The Figures 2, B, C, D, are derived from these images but at 60x magnification.

**Table S1** DCLK1-responsive genes. Summary of differentially expressed genes due to DCLK1 overexpression in Huh7 cells with statistical analysis (*p*-values are shown for each gene).

| GENE ID       | FOLD INCREASE | ADJUSTED p-VALUE |
|---------------|---------------|------------------|
| <b>DCLK1</b>  | <b>148.01</b> | <b>0.00E+00</b>  |
| 100128460     | 24.11         | 6.01E-06         |
| DDT           | 21.62         | 2.98E-05         |
| <b>S100A9</b> | <b>18.29</b>  | <b>2.40E-04</b>  |
| FGF18         | 14.97         | 1.79E-03         |
| TLE6          | 14.97         | 1.79E-03         |
| 9668          | 13.3          | 4.63E-03         |
| OLFML1        | 13.3          | 4.63E-03         |
| PHLDA2        | 13.3          | 4.63E-03         |
| ESPNP         | 13.3          | 4.63E-03         |
| RP11-631M21.2 | 11.64         | 1.21E-02         |
| COL8A2        | 11.64         | 1.21E-02         |
| FLJ23834      | 11.64         | 7.99E-05         |
| CTSK          | 10.81         | 1.93E-02         |
| 100507111     | 10.81         | 1.93E-02         |
| XDH           | 10.81         | 1.93E-02         |
| PKD2L1        | 10.81         | 1.93E-02         |
| LOC100129195  | 9.98          | 3.04E-02         |
| DCDC2B        | 9.98          | 3.04E-02         |
| PYY           | 9.98          | 3.04E-02         |
| PAQR8         | 9.98          | 3.04E-02         |
| 100507213     | 9.98          | 5.63E-04         |
| SLC6A16       | 9.98          | 3.04E-02         |
| 100506346     | 9.15          | 4.68E-02         |
| GHRL          | 9.15          | 4.68E-02         |
| LOC729603     | 9.15          | 1.44E-03         |
| ZNF699        | 9.15          | 4.68E-02         |
| 693224        | 9.15          | 4.68E-02         |
| POU3F2        | 9.15          | 1.44E-03         |
| EPO           | 9.15          | 1.44E-03         |
| SPRY3         | 8.32          | 7.24E-02         |
| 26816         | 8.32          | 7.24E-02         |
| NPTX2         | 8.32          | 3.57E-03         |
| LOC100132460  | 8.32          | 3.57E-03         |
| LOC100129858  | 8.32          | 7.24E-02         |
| LOC642340     | 8.32          | 7.24E-02         |
| C3orf42       | 8.32          | 7.24E-02         |
| LRRC33        | 8.32          | 7.24E-02         |
| LTBP2         | 8.32          | 7.24E-02         |
| SLC6A15       | 8.32          | 3.57E-03         |
| CRISP3        | 8.32          | 7.24E-02         |
| SLC27A5       | 8.32          | 7.24E-02         |

| GENE ID      | FOLD INCREASE | ADJUSTED p-VALUE |
|--------------|---------------|------------------|
| CNSH6.4      | 8.32          | 7.24E-02         |
| CXorf22      | 8.32          | 3.57E-03         |
| GRB7         | 8.32          | 7.24E-02         |
| CDC42EP5     | 8.32          | 7.24E-02         |
| IL1RN        | 8.32          | 7.24E-02         |
| DUSP26       | 8.32          | 7.24E-02         |
| GLDN         | 8.32          | 7.24E-02         |
| LOC100130856 | 7.9           | 5.55E-03         |
| 26784        | 7.48          | 8.60E-03         |
| ZNF331       | 7.48          | 8.60E-03         |
| CYP2S1       | 7.48          | 8.60E-03         |
| LOC653781    | 7.48          | 8.60E-03         |
| INHA         | 7.07          | 1.34E-02         |
| SULF2        | 6.86          | 8.09E-09         |
| PRDM1        | 6.65          | 2.04E-02         |
| ZRSR2        | 6.65          | 2.04E-02         |
| HEY1         | 6.65          | 2.04E-02         |
| PDZRN3       | 6.65          | 2.04E-02         |
| DLK1         | 6.58          | 2.28E-12         |
| LRP5L        | 6.24          | 3.11E-02         |
| HIST1H2AL    | 6.24          | 3.11E-02         |
| LFNG         | 6.1           | 5.80E-11         |
| LOC219347    | 5.82          | 4.61E-02         |
| hCG_2008140  | 5.82          | 4.61E-02         |
| 100289341    | 5.82          | 4.61E-02         |
| FAM108C1     | 5.82          | 4.61E-02         |
| VWA5A        | 5.82          | 4.61E-02         |
| KLHL26       | 5.82          | 4.61E-02         |
| 100505945    | 5.82          | 4.61E-02         |
| CA5BP        | 5.82          | 1.40E-03         |
| ASB2         | 5.82          | 4.61E-02         |
| 648359       | 5.82          | 4.61E-02         |
| TMEM154      | 5.82          | 4.61E-02         |
| C9orf117     | 5.61          | 2.12E-03         |
| DDN          | 5.41          | 3.18E-03         |
| PLAUR        | 5.41          | 6.88E-02         |
| HOXD1        | 5.41          | 4.25E-02         |
| SLC41A1      | 5.41          | 4.28E-02         |
| PCDHB11      | 5.41          | 4.31E-02         |
| ZNF788       | 5.27          | 4.34E-02         |
| ZNF580       | 5.2           | 4.38E-02         |
| GUCY2C       | 5.16          | 4.41E-02         |

| GENE ID      | FOLD DECREASE | ADJUSTED p-VALUE |
|--------------|---------------|------------------|
| MYLK4        | 21.65         | 1.02E-04         |
| APBB1IP      | 16.84         | 1.47E-03         |
| LAMC2        | 15.63         | 2.76E-03         |
| ANXA8        | 14.43         | 5.13E-03         |
| LOC202181    | 12.03         | 1.78E-02         |
| 100507227    | 12.03         | 1.78E-02         |
| IL31RA       | 12.03         | 1.78E-02         |
| LOC285768    | 12.03         | 1.78E-02         |
| 100506266    | 12.03         | 1.78E-02         |
| FBXO16       | 12.03         | 1.78E-02         |
| 692093       | 12.03         | 1.78E-02         |
| PTPRE        | 12.03         | 1.78E-02         |
| SH3TC2       | 12.03         | 1.78E-02         |
| BHLHE41      | 11.42         | 3.40E-04         |
| CA5B         | 10.82         | 6.35E-04         |
| ZNF850P      | 9.62          | 2.13E-03         |
| PITPNM3      | 9.62          | 2.13E-03         |
| 100302692    | 9.62          | 2.13E-03         |
| TMEM27       | 9.02          | 3.83E-03         |
| 344405       | 8.42          | 6.83E-03         |
| 100506503    | 8.42          | 4.28E-04         |
| ZNF442       | 8.42          | 6.83E-03         |
| GPLD1        | 7.82          | 1.22E-02         |
| GRAMD2       | 7.22          | 2.11E-02         |
| C8orf47      | 7.22          | 2.11E-02         |
| CCBP2        | 7.22          | 2.11E-02         |
| 100505616    | 7.22          | 2.11E-02         |
| LOC100129250 | 6.61          | 3.62E-02         |
| 100288069    | 6.61          | 3.62E-02         |
| WHAMML1      | 6.61          | 3.62E-02         |
| C19orf26     | 6.31          | 1.44E-03         |
| 286749       | 6.01          | 6.07E-02         |
| B3GALT2      | 6.01          | 2.67E-06         |
| 100505668    | 6.01          | 6.07E-02         |
| LRRIQ3       | 6.01          | 6.07E-02         |
| IL7          | 6.01          | 6.07E-02         |
| 401317       | 6.01          | 6.07E-02         |
| hCG_1811337  | 6.01          | 6.07E-02         |
| 100507006    | 6.01          | 6.07E-02         |
| 100505734    | 6.01          | 6.07E-02         |
| LOC100128292 | 6.01          | 6.07E-02         |
| BDNF         | 6.01          | 6.07E-02         |
| 100132101    | 6.01          | 6.07E-02         |
| GBP1         | 5.79          | 0.00E+00         |
| CCDC80       | 5.71          | 1.91E-11         |
| ERAP2        | 5.41          | 7.04E-03         |
| FILIP1       | 5.41          | 7.04E-03         |
| LYPD6B       | 5.41          | 2.56E-05         |
| KCND1        | 5.41          | 7.04E-03         |
| UPK3A        | 5.29          | 2.33E-03         |
